# Supplementary material for: First record of Phanuropsis laniger Johnson in Brazil and first record of Phanuropsis semiflaviventris Girault in Amazonas (Hymenoptera: Platygastridae) with notes of their hosts, stink-bugs of cupuaçu
Source: Biodivers Data J. 2016 Apr 14;(4):e8142. doi: 10.3897/BDJ.4.e8142 (PMC4867698; doi:10.3897/BDJ.4.e8142)
Supplement: Supplementary material 1 — Phanuropsis laniger_DarwinCoreFile [file biodiversity_data_journal-4-e8142-s001.xlsx]

## Sheet: Records
occurence_lsid	language	basisOfRecord	catalogNumber	scientificNameID	scientificName	sex	lifeStage	preparations	individualCount	institutionCode	collectionCode	fieldNotes	locality	decimalLatitude	decimalLongitude	georeferenceSources	country	stateProvince	county	municipality	georeferenceRemarks	VerbatimEventDate	eventDate	eventTime	recordedBy	samplingProtocol	fieldNumber	identifiedBy	dateIdentified	typeStatus	kingdom	phylum	class	order	family	genus	specificEpithet	infraspecificEpithet	habitat	associatedTaxa	source	modified
urn:lsid:biosci.ohio-state.edu:osuc_occurrences:INPA-HYM__031340	en	PreservedSpecimen	INPA-HYM 031340	urn:lsid:biosci.ohio-state.edu:osuc_names:2577	Phanuropsis laniger	undetermined	adult	pin	1	Coleção de Invertebrados, Instituto Nacional de Pesquisas da Amazônia, Manaus, AM, Brasil (INPA)	Insects	Em folha de Theobroma grandifolium; [BRAZIL: Amazonas: Manaus INPA Campus II. 3°5'45.80"S 59°59'21.86"W Coll. T. Mahlmann] [19 Mar 2014]	INPA Campus II, 3°5'45.80"S 59°59'21.86"W, Manaus, Amazonas St., Brazil	-3.0961	-59.9894	label	Brazil	Amazonas				19 March 2014	2014-03-19		Mahlmann, T. (Thiago)	none specified		Olivera, B. G. (Bruno Garcia)	2014		Animalia	Arthropoda	Hexapoda	Hymenoptera	Platygastridae	Phanuropsis	laniger			Theobroma grandiflorum	http://hol.osu.edu/spmInfo.html?id=INPA-HYM%20031340	2016-03-22T16:44:26Z
